# Supplementary material for: Axillary lymph node dissection plus radiotherapy may be an optimal strategy for patients with occult breast cancer
Source: PubMed Central journal article supplement — J Natl Cancer Cent. 2022 Sep 24;2(4):198–204. doi: 10.1016/j.jncc.2022.09.001 (PMC11256547; doi:10.1016/j.jncc.2022.09.001), 2022-09-24
Supplement: mmc1.pdf [file mmc1.pdf]

## **Supplementary materials**

### **Axillary lymph node dissection plus radiotherapy may be an optimal strategy for patients with occult breast cancer**

Lixi Li, Di Zhang, Tingyu Wen, Yun Wu, Dan Lv, Jingtong Zhai, Fei Ma

### Supplementary Table 1

Univariate and multivariate analyses for BCSS and OS before PSM.

| Characteristics                | BCSS               |          |                    |          | OS                 |          |                    |          |
|--------------------------------|--------------------|----------|--------------------|----------|--------------------|----------|--------------------|----------|
|                                | Univariate         |          | Multivariate       |          | Univariate         |          | Multivariate       |          |
|                                | HR (95% CI)        | <i>P</i> |
| <b>Year of diagnosis</b>       |                    |          |                    |          |                    |          |                    |          |
| 2004-2010                      | 1                  |          | 1                  |          | 1                  |          | 1                  |          |
| 2011-2015                      | 0.800(0.348-1.843) | 0.601    | 0.922(0.262-3.243) | 0.899    | 0.579(0.330-1.014) | 0.056    | 0.537(0.249-1.157) | 0.113    |
| <b>Age at diagnosis (year)</b> |                    |          |                    |          |                    |          |                    |          |
| < 60                           | 1                  |          | 1                  |          | 1                  |          | 1                  |          |
| ≥ 60                           | 1.326(0.694-2.533) | 0.393    | 1.445(0.734-2.847) | 0.287    | 1.581(1.082-2.310) | 0.018    | 1.439(0.970-2.135) | 0.071    |
| <b>ER</b>                      |                    |          |                    |          |                    |          |                    |          |
| Negative                       | 1                  |          | 1                  |          | 1                  |          | 1                  |          |
| Positive                       | 0.359(0.177-0.726) | 0.004    | 0.394(0.153-1.012) | 0.053    | 0.747(0.505-1.104) | 0.143    | 0.641(0.374-1.097) | 0.104    |
| Unknown                        | 0.479(0.143-1.599) | 0.231    | 1.144(0.081-16.23) | 0.921    | 0.650(0.319-1.324) | 0.235    | 0.311(0.094-1.031) | 0.056    |
| <b>PR</b>                      |                    |          |                    |          |                    |          |                    |          |
| Negative                       | 1                  |          | 1                  |          | 1                  |          | 1                  |          |
| Positive                       | 0.470(0.219-1.007) | 0.052    | 0.813(0.297-2.226) | 0.687    | 0.896(0.597-1.345) | 0.597    | 1.187(0.679-2.074) | 0.547    |

|                        |                     |         |                     |         |                    |         |                    |         |
|------------------------|---------------------|---------|---------------------|---------|--------------------|---------|--------------------|---------|
| Unknown                | 0.490(0.148-1.625)  | 0.244   | 0.482(0.036-6.462)  | 0.582   | 0.903(0.495-1.647) | 0.738   | 1.690(0.627-4.552) | 0.299   |
| <b>HER2</b>            |                     |         |                     |         |                    |         |                    |         |
| Negative               | 1                   |         | 1                   |         | 1                  |         | 1                  |         |
| Positive               | 0.307(0.039-2.427)  | 0.263   | 0.240(0.03-1.939)   | 0.181   | 0.260(0.061-1.109) | 0.069   | 0.270(0.063-1.164) | 0.079   |
| Unknown                | 0.893(0.404-1.973)  | 0.780   | 0.748(0.225-2.489)  | 0.636   | 1.048(0.633-1.733) | 0.856   | 0.711(0.358-1.412) | 0.329   |
| <b>Grade</b>           |                     |         |                     |         |                    |         |                    |         |
| I-II                   | 1                   |         | 1                   |         | 1                  |         | 1                  |         |
| III-IV                 | 1.280(0.280-5.854)  | 0.751   | 0.595(0.117-3.022)  | 0.531   | 0.982(0.402-2.400) | 0.969   | 0.958(0.372-2.464) | 0.928   |
| Unknown                | 0.910(0.215-3.846)  | 0.898   | 0.509(0.109-2.369)  | 0.389   | 0.909(0.396-2.087) | 0.822   | 0.964(0.403-2.308) | 0.935   |
| <b>Lymph node</b>      |                     |         |                     |         |                    |         |                    |         |
| N1                     | 1                   |         | 1                   |         | 1                  |         | 1                  |         |
| N2                     | 2.928(1.218-7.037)  | 0.016   | 2.919(1.165-7.310)  | 0.022   | 2.223(1.424-3.471) | < 0.001 | 2.226(1.400-3.540) | 0.001   |
| N3                     | 4.976(2.278-10.868) | < 0.001 | 6.984(2.905-16.793) | < 0.001 | 2.003(1.268-3.166) | 0.003   | 2.276(1.378-3.759) | 0.001   |
| <b>RNE</b>             |                     |         |                     |         |                    |         |                    |         |
| < 10                   | 1                   |         | 1                   |         | 1                  |         | 1                  |         |
| ≥ 10                   | 0.978(0.491-1.947)  | 0.950   | 0.528(0.244-1.144)  | 0.106   | 1.096(0.729-1.648) | 0.660   | 0.892(0.573-1.388) | 0.612   |
| <b>Chemotherapy</b>    |                     |         |                     |         |                    |         |                    |         |
| No                     | 1                   |         | 1                   |         | 1                  |         | 1                  |         |
| Yes                    | 1.017(0.446-2.317)  | 0.968   | 0.804(0.324-1.995)  | 0.639   | 0.503(0.337-0.752) | 0.001   | 0.417(0.267-0.651) | < 0.001 |
| <b>Local treatment</b> |                     |         |                     |         |                    |         |                    |         |
| Mastectomy + ALND      | 1                   |         | 1                   |         | 1                  |         | 1                  |         |

ALND +radiotherapy 0.841(0.603-1.173) 0.308 0.688(0.350-1.351) 0.277 0.750(0.512-1.099) 0.140 0.667(0.451-0.987) 0.043

---

Abbreviations: ALND, axillary lymph node dissection; BCSS, breast cancer-specific survival; CI, confidence interval; ER, estrogen receptor; HER2, human epidermal growth factor receptor 2; HR, hazard ratio; OS, overall survival; PR, progesterone receptors; PSM, propensity score matching; RNE, regional lymph node examined.

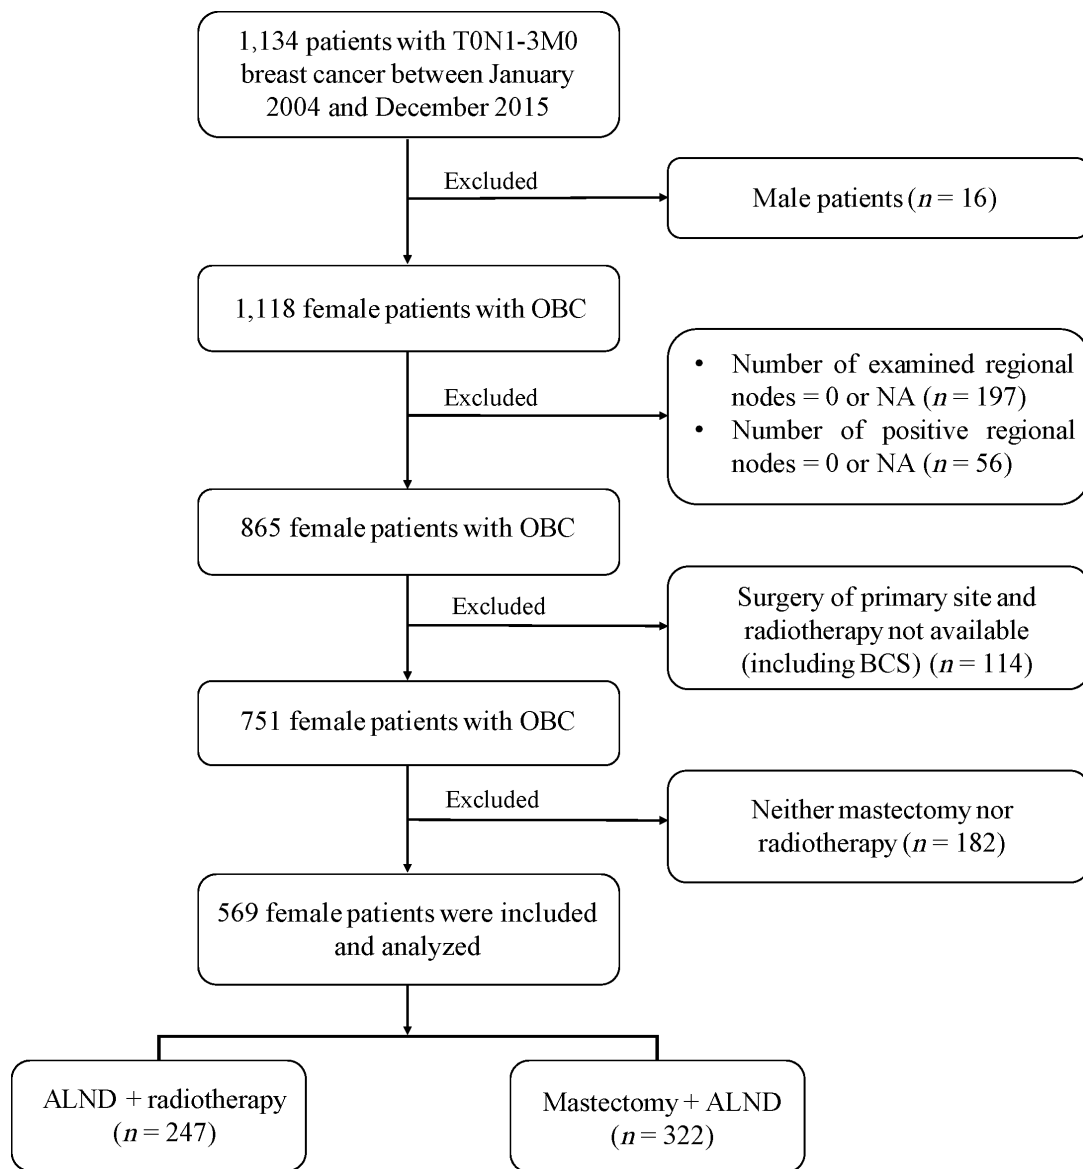

**Supplementary Fig. 1.** The flow diagram of the patient selection process. ALND, axillary lymph node dissection; BCS, breast conserving surgery; NA, not available; OBC, occult breast cancer.
